# Supplementary material for: Template-free facile solution synthesis and optical properties of ZnO mesocrystals
Source: Royal Society of Chemistry journal article supplement (doi:10.1039/c2ce26638e), 2012-11-14
Supplement: c2ce26638e.pdf [file c2ce26638e.pdf]

# Electronic Supplementary Information for: Template-free facile solution synthesis and optical properties of ZnO mesocrystals

Sha-Sha Wang, and An-Wu Xu\*

*Division of Nanomaterials and Chemistry, Hefei National Laboratory for Physical Sciences at Microscale, Department of Chemistry, University of Science and Technology of China, 230026 Hefei, China*

*Fax: (+86) 551-360 3040, E-mail: anwuxu@ustc.edu.cn*

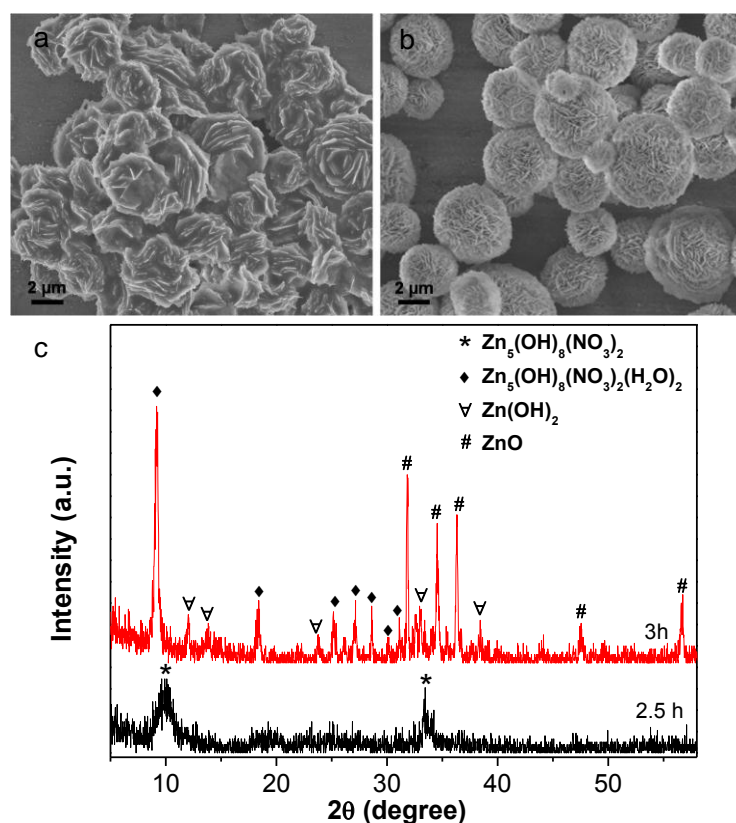

**Figure S1.** (a, b) SEM images of the products reaction for (a) 2.5 h; (b) 3 h at 120 °C. (c) The corresponding XRD patterns.

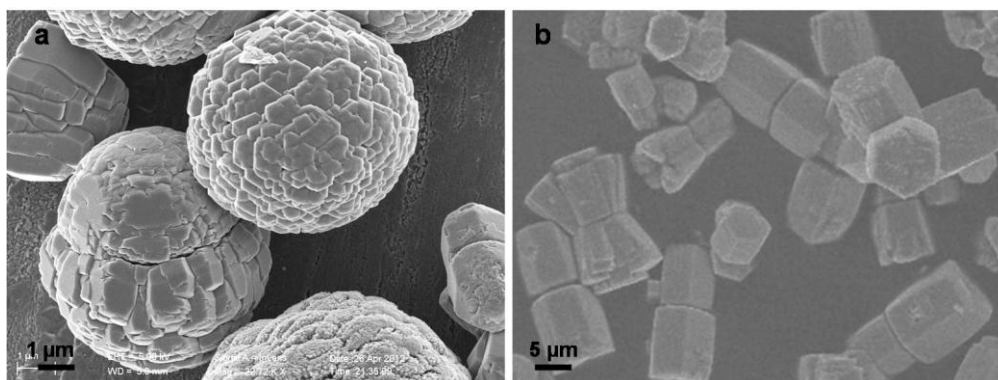

**Figure S2.** SEM images of the products formed at different temperatures for 12 h: (a) 130 °C; (b) 180 °C.

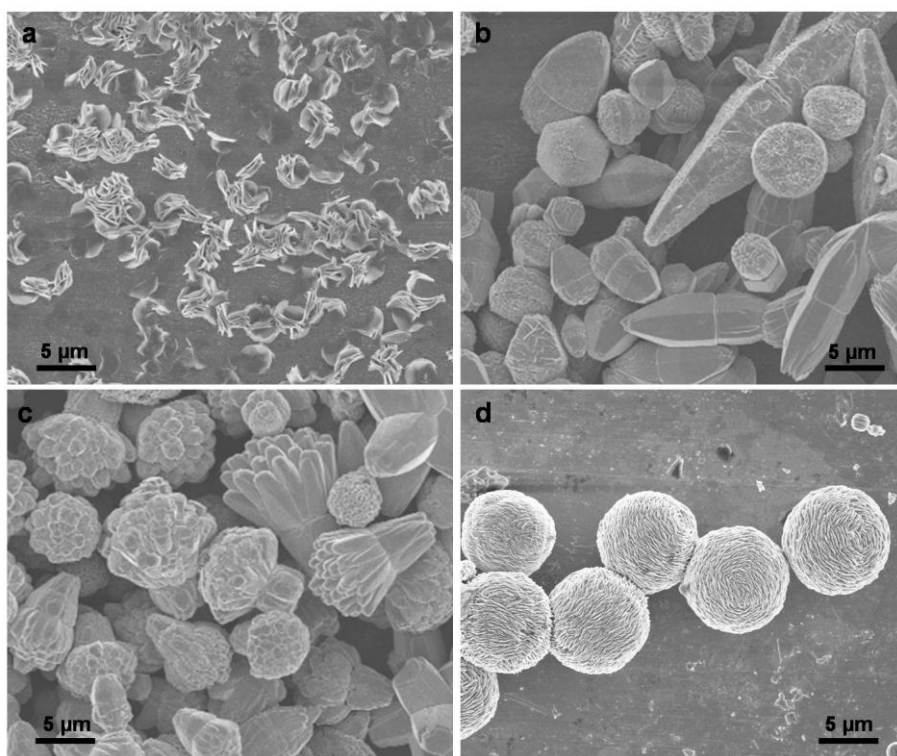

**Figure S3.** SEM images of the samples formed at 120 °C for 12 h with different reaction solvents: (a) methanol; (b) ethanol; (c) isopropanol; (d) butanol.

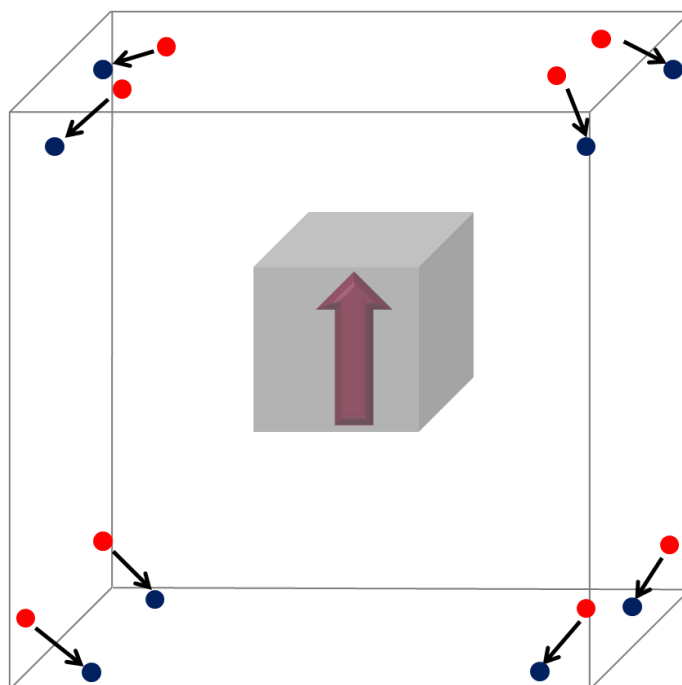

**Figure S4.** We numerically simulated our material using the Mathematica 7 software. Our model employs eight symmetric electrical dipoles, and each occupies a vertex of the cuboids. These dipoles stand for the nanoplatelets surrounding the mesocrystal spheres. We use

this model to illustrate how the dipole-dipole interactions between the nanoplatelets and the electric field generated from ZnO mesocrystal microspheres.

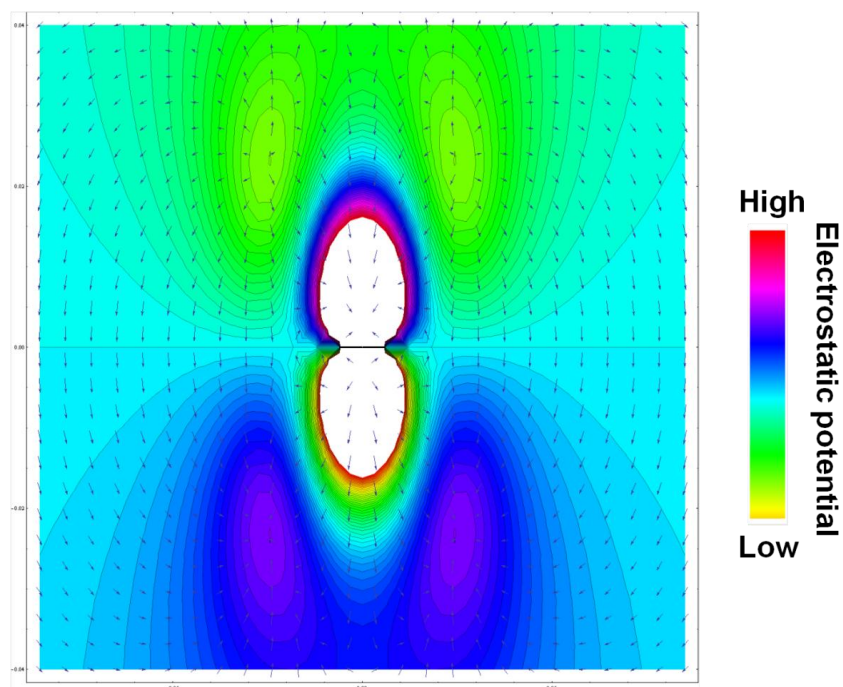

**Figure S5.** The simulated electric field (gray arrows) and electric potential (color lines) distributions of the core model prism.

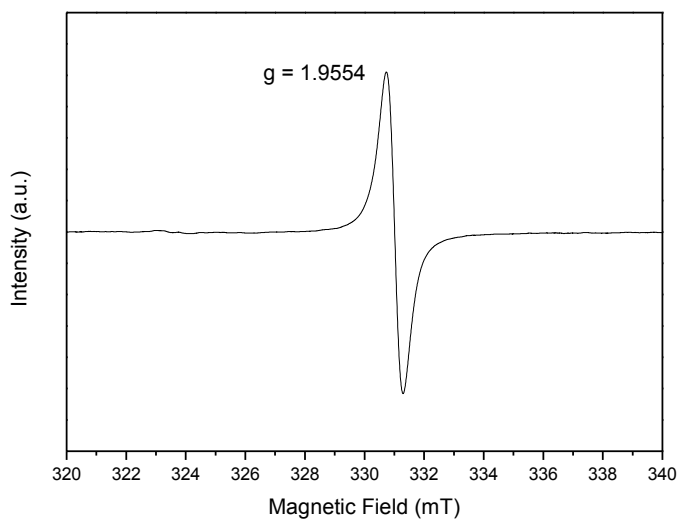

**Figure S6.** EPR spectrum of ZnO microspheres recorded at room temperature.
